# Supplementary material for: Simultaneous enhancement of electrical conductivity and interlaminar fracture toughness of carbon fiber/epoxy composites using plasma-treated conductive thermoplastic film interleaves
Source: Royal Society of Chemistry journal article supplement (doi:10.1039/c8ra05366a), 2018-01-01
Supplement: c8ra05366a1.pdf [file c8ra05366a1.pdf]

## Supporting Information

### **Simultaneous enhancement of electrical conductivity and interlaminar fracture toughness of carbon fiber/epoxy composites using plasma-treated conductive thermoplastic film interleaves**

Wei Li <sup>1</sup>, Dong Xiang <sup>1, \*</sup>, Lei Wang <sup>1</sup>, Eileen Harkin-Jones <sup>2</sup>, Chunxia Zhao <sup>1</sup>, Bin Wang<sup>1</sup>, Yuntao Li <sup>1, \*</sup>

W. Li, Dr. D. Xiang, L. Wang, Dr. C. X. Zhao, Prof. B. Wang, Prof. Y. T. Li

1. School of Materials Science and Engineering, Southwest Petroleum University,  
Chengdu 610500, China

E-mail: [dxiang01@hotmail.com](mailto:dxiang01@hotmail.com);

[yuntaoli@swpu.edu.cn](mailto:yuntaoli@swpu.edu.cn)

Prof. E. Harkin-Jones

2. School of Engineering, University of Ulster, Jordanstown BT37 0QB, UK

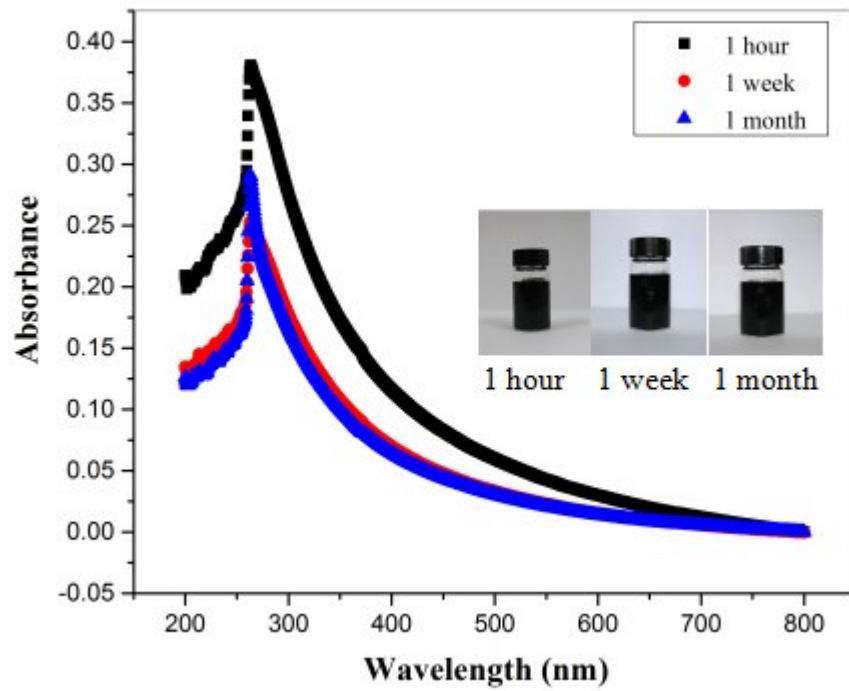

Fig.S1. Typical UV–Vis spectra of 15 wt% MWCNT/DMF suspension. Inset: optical images of diluted suspension after one hour, one week, and one month. The suspension was diluted by 250 times for characterization. UV-Vis measurements were carried out from 200 to 800 nm.

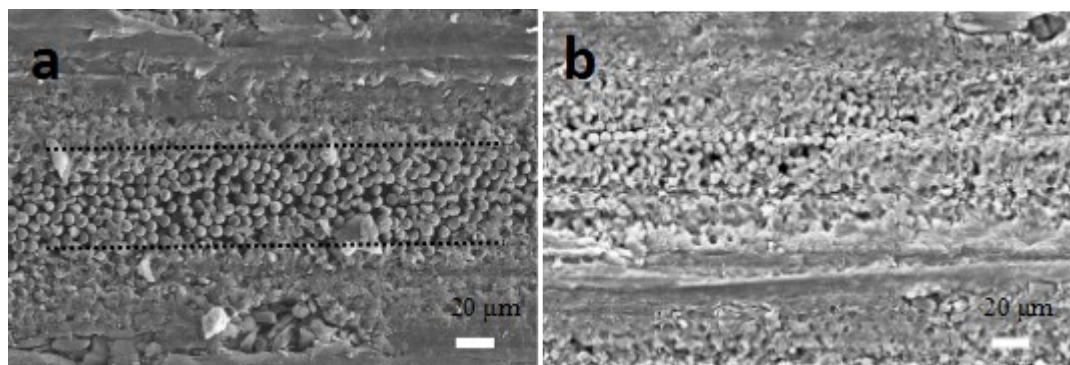

Fig.S2 Cross-sections of (a) PC10 and (b) PC10-M in the fiber direction at low magnification.
